# Supplementary material for: Green one-step pyrolytic synthesis of folic acid-derived carbon dots for sensitive turn-on fluorescence detection of cysteine
Source: Royal Society of Chemistry journal article supplement (doi:10.1039/d4an01144a), 2024-01-01
Supplement: d4an01144a1.pdf [file d4an01144a1.pdf]

**Supplementary information**

**Green One-step Pyrolytic Synthesis of Folic Acid-Derived Carbon  
Dots for Sensitive Turn-on Fluorescence Detection of Cysteine**

Jie Huang, Ruicheng Xu, Qiaoting Yang, Kang Tao, Dan Shan\*

*School of Environmental and Biological Engineering, Nanjing University of Science and  
Technology, Nanjing 210094, P R China*

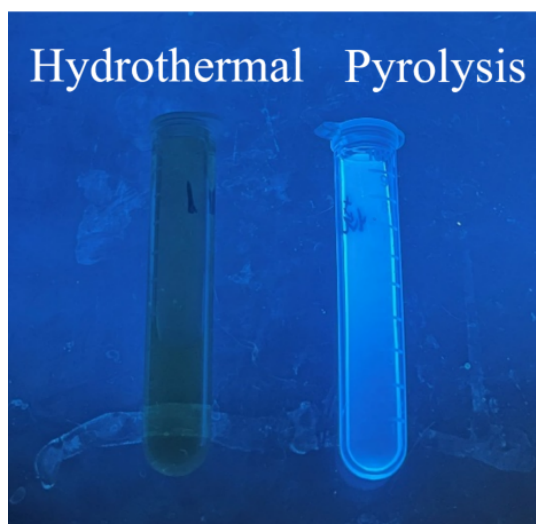

**Figure S1** Comparison of the fluorescence of intensity between FACDs synthesized via hydrothermal (left) and pyrolysis (right) methods.

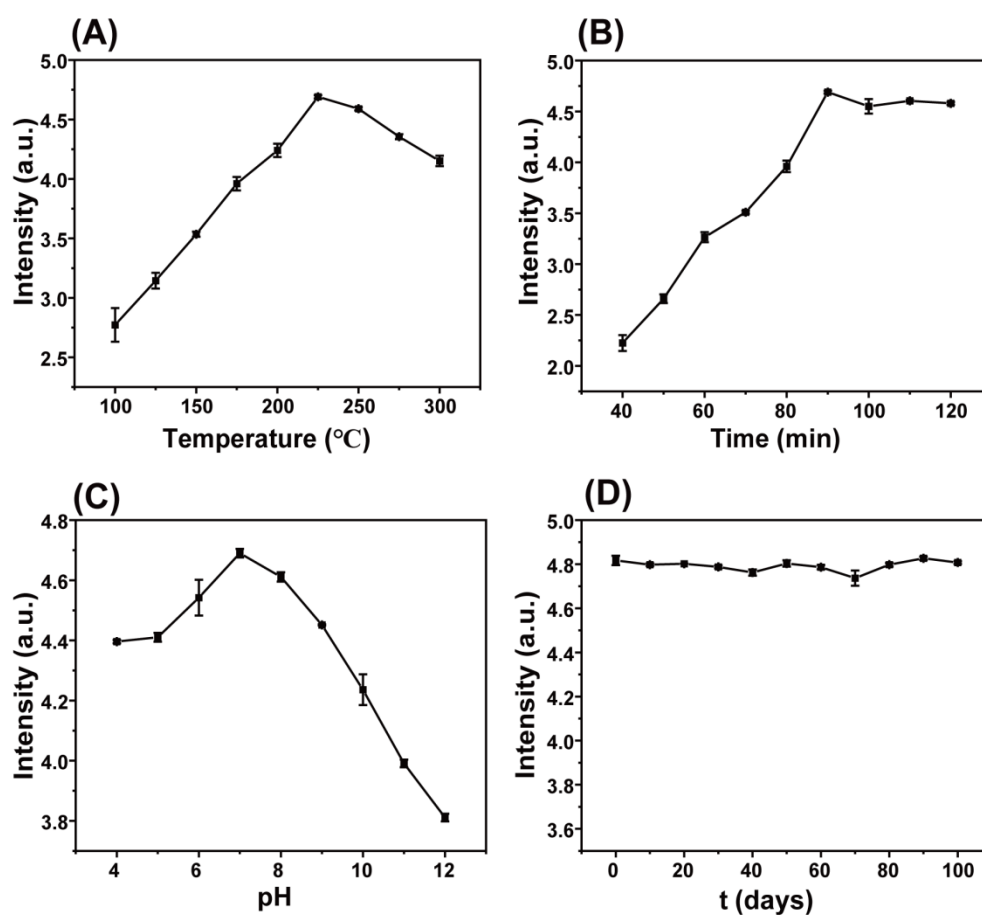

**Figure S2** Optimized conditions for the synthesis of fluorescent FACS: **(A)** Calcination temperature of FA in a muffle furnace, **(B)** Calcination duration in a muffle furnace for the FACS synthesis, **(C)** pH of the dispersed FACS solution, and **(D)** Long-term stability of FACS over time.

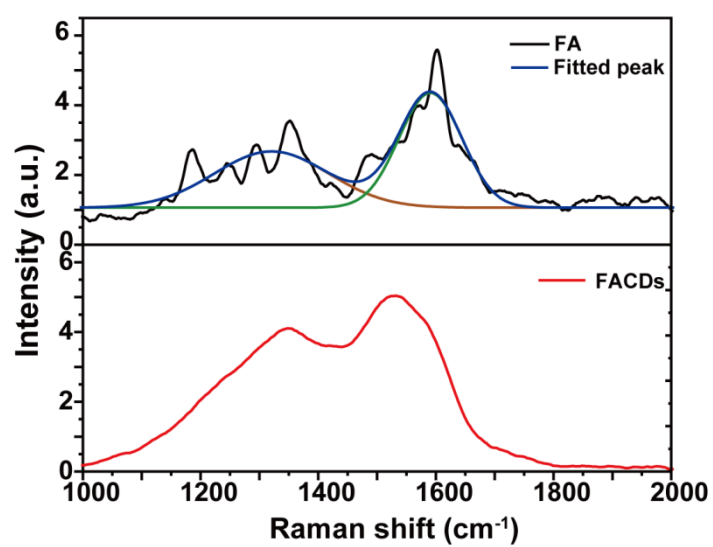

**Figure S3** Raman comparison of FA and FACDs.

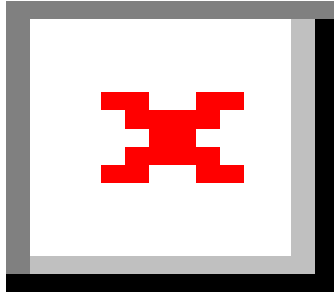

**Figure S4** The effect of temperature fluctuations on the performance of the sensor

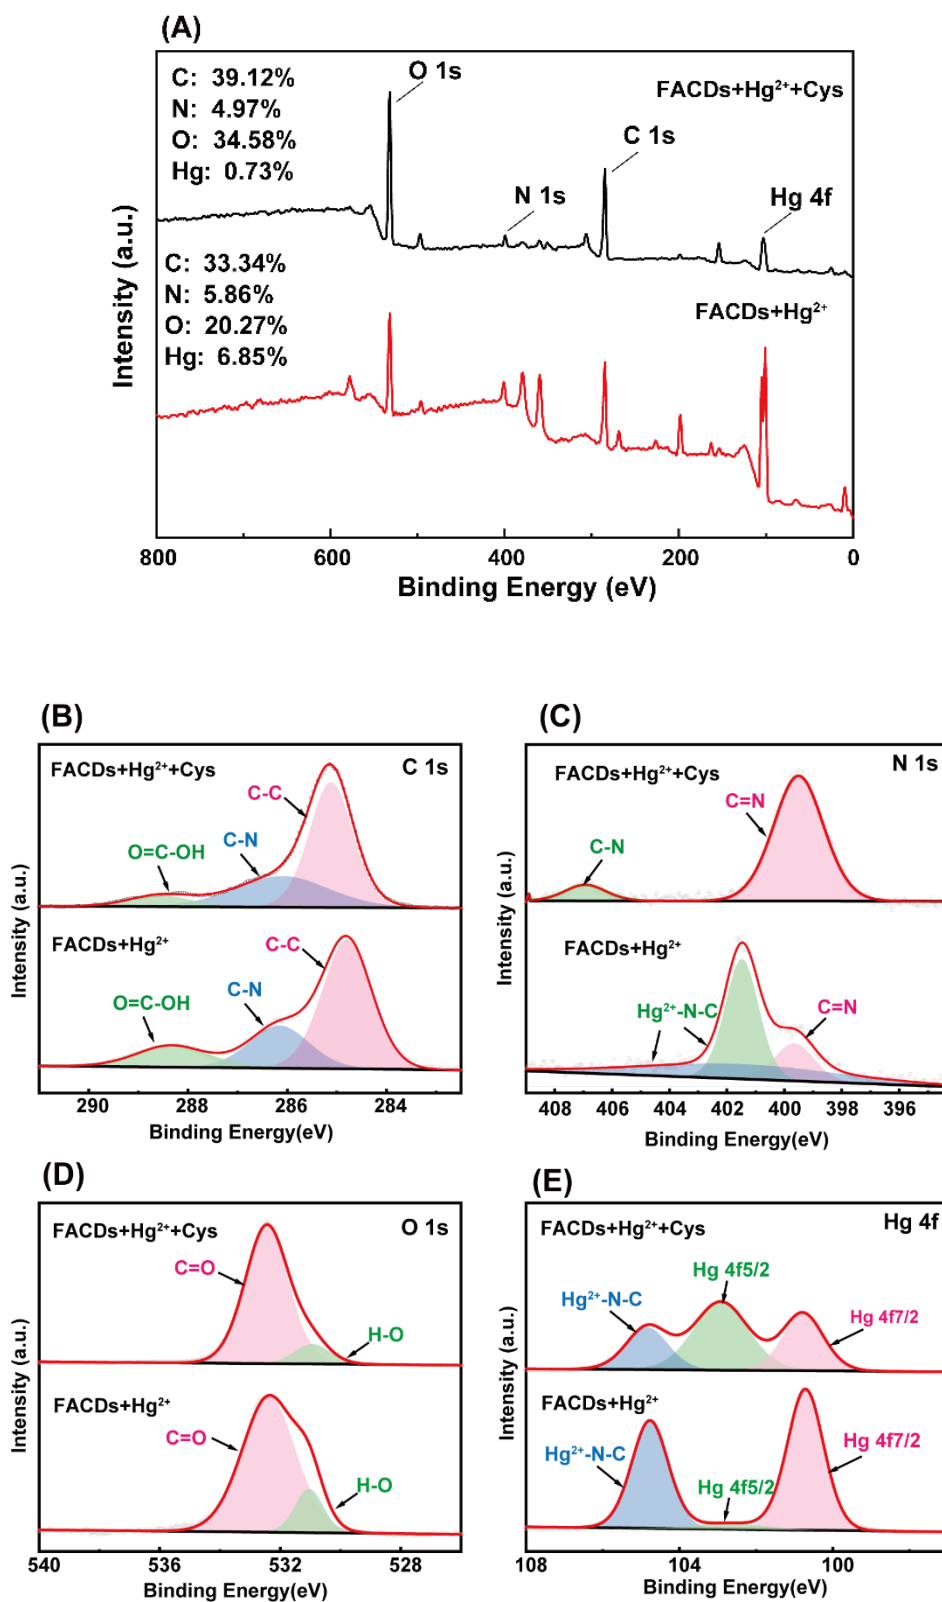

**Figure S5** (A) XPS survey spectra and deconvoluted spectra of (B) C 1s, (C) O 1s, (D) N 1s, (E) Hg 4f.
